# Supplementary material for: Planar polarity in primate cone photoreceptors: a potential role in Stiles Crawford effect phototropism
Source: PubMed Central journal article supplement (PMC8786850; doi:10.1038/s42003-021-02998-y), 2022-01-24
Supplement: 42003_2021_2998_MOESM11_ESM.pdf [file 42003_2021_2998_MOESM11_ESM.pdf]

## Reporting Summary

Nature Research wishes to improve the reproducibility of the work that we publish. This form provides structure for consistency and transparency in reporting. For further information on Nature Research policies, see our [Editorial Policies](#) and the [Editorial Policy Checklist](#).

### Statistics

For all statistical analyses, confirm that the following items are present in the figure legend, table legend, main text, or Methods section.

n/a Confirmed

- The exact sample size ( $n$ ) for each experimental group/condition, given as a discrete number and unit of measurement
- A statement on whether measurements were taken from distinct samples or whether the same sample was measured repeatedly
- The statistical test(s) used AND whether they are one- or two-sided  
*Only common tests should be described solely by name; describe more complex techniques in the Methods section.*
- A description of all covariates tested
- A description of any assumptions or corrections, such as tests of normality and adjustment for multiple comparisons
- A full description of the statistical parameters including central tendency (e.g. means) or other basic estimates (e.g. regression coefficient) AND variation (e.g. standard deviation) or associated estimates of uncertainty (e.g. confidence intervals)
- For null hypothesis testing, the test statistic (e.g.  $F$ ,  $t$ ,  $r$ ) with confidence intervals, effect sizes, degrees of freedom and  $P$  value noted  
*Give  $P$  values as exact values whenever suitable.*
- For Bayesian analysis, information on the choice of priors and Markov chain Monte Carlo settings
- For hierarchical and complex designs, identification of the appropriate level for tests and full reporting of outcomes
- Estimates of effect sizes (e.g. Cohen's  $d$ , Pearson's  $r$ ), indicating how they were calculated

*Our web collection on [statistics for biologists](#) contains articles on many of the points above.*

### Software and code

Policy information about [availability of computer code](#)

Data collection Data were collected using Fluoview FV1000.

Data analysis Data analysis were performed using Fiji ImageJ1.53c, Imaris x64 software (version 8.4.1 and 9.2.1 Bitplane), GraphPad prism 9 and Matlab.

For manuscripts utilizing custom algorithms or software that are central to the research but not yet described in published literature, software must be made available to editors and reviewers. We strongly encourage code deposition in a community repository (e.g. GitHub). See the Nature Research [guidelines for submitting code & software](#) for further information.

### Data

Policy information about [availability of data](#)

All manuscripts must include a [data availability statement](#). This statement should provide the following information, where applicable:

- Accession codes, unique identifiers, or web links for publicly available datasets
- A list of figures that have associated raw data
- A description of any restrictions on data availability

The data that support the main findings of this study are openly available in figShare

## Field-specific reporting

Please select the one below that is the best fit for your research. If you are not sure, read the appropriate sections before making your selection.

Life sciences  Behavioural & social sciences  Ecological, evolutionary & environmental sciences

For a reference copy of the document with all sections, see [nature.com/documents/nr-reporting-summary-flat.pdf](https://www.nature.com/documents/nr-reporting-summary-flat.pdf)

## Life sciences study design

All studies must disclose on these points even when the disclosure is negative.

|                 |                                                                                                                                                                                                                                                                                                                                      |
|-----------------|--------------------------------------------------------------------------------------------------------------------------------------------------------------------------------------------------------------------------------------------------------------------------------------------------------------------------------------|
| Sample size     | No sample-size calculation was performed. Whole macaque retinas being rare and difficult to obtain, we replicate our planar polarity quantification on two independent animals. As the results showed similar results, we considered them sufficient.                                                                                |
| Data exclusions | No data were excluded from the analyses.                                                                                                                                                                                                                                                                                             |
| Replication     | replication were successful.                                                                                                                                                                                                                                                                                                         |
| Randomization   | Randomization was not relevant to our study, as we did not test for the effect of a certain phenomenon and no allocation was necessary.                                                                                                                                                                                              |
| Blinding        | Figure 5 : planar polarity. Investigator performing the angular analysis were blind to the sample placement within the retina, to the position of the fovea compared to the sample, and to the other investigator analysis results. Angular quantifications were performed independently and blindly by two different investigators. |

## Reporting for specific materials, systems and methods

We require information from authors about some types of materials, experimental systems and methods used in many studies. Here, indicate whether each material, system or method listed is relevant to your study. If you are not sure if a list item applies to your research, read the appropriate section before selecting a response.

### Materials & experimental systems

| n/a                                 | Involvement in the study                                        |
|-------------------------------------|-----------------------------------------------------------------|
| <input type="checkbox"/>            | <input checked="" type="checkbox"/> Antibodies                  |
| <input checked="" type="checkbox"/> | <input type="checkbox"/> Eukaryotic cell lines                  |
| <input checked="" type="checkbox"/> | <input type="checkbox"/> Palaeontology and archaeology          |
| <input type="checkbox"/>            | <input checked="" type="checkbox"/> Animals and other organisms |
| <input checked="" type="checkbox"/> | <input type="checkbox"/> Human research participants            |
| <input checked="" type="checkbox"/> | <input type="checkbox"/> Clinical data                          |
| <input checked="" type="checkbox"/> | <input type="checkbox"/> Dual use research of concern           |

### Methods

| n/a                                 | Involvement in the study                        |
|-------------------------------------|-------------------------------------------------|
| <input checked="" type="checkbox"/> | <input type="checkbox"/> ChIP-seq               |
| <input checked="" type="checkbox"/> | <input type="checkbox"/> Flow cytometry         |
| <input checked="" type="checkbox"/> | <input type="checkbox"/> MRI-based neuroimaging |

## Antibodies

### Antibodies used

Commercial antibodies :

anti Acetyl-alpha-Tubulin (Lys40), Rabbit monoclonal, Cat# SAB5600134, Sigma Aldrich;  
 anti acetyl-alpha tubulin, clone 6-11B-1, Mouse monoclonal, Cat# MABT868, Sigma Aldrich; RRID:AB\_2819178  
 anti Centrin 3 antibody, Rabbit polyclonal, Cat# ab228690, Abcam;  
 anti Opsin Antibody, Red/Green Rabbit polyclonal, Cat# AB5405, Sigma Aldrich; RRID:AB\_177456  
 anti Espin 1 Mouse monoclonal, Cat# sc-515657, Santa Cruz Biotechnology;  
 anti Protocadherin-15, Sheep polyclonal, Cat# AF6729, Biotechne; RRID:AB\_10892338  
 anti Prominin 1, Mouse monoclonal, Cat# MA1219, ThermoFisher; RRID:AB\_2725113  
 anti Rhodopsin, clone RET-P1, Mouse monoclonal, Cat# MAB5316, Sigma Aldrich; RRID:AB\_2156055  
 anti Gα t1, Rod transducing Mouse monoclonal, Cat# sc-136143, Santa Cruz Biotechnology; RRID:AB\_2294751  
 anti CROCC (Rootletin), Rabbit polyclonal, Cat# NBP180820, Biotechne; RRID:AB\_11019491  
 anti Mouse Donkey polyclonal 488, Cat# A-21202, Invitrogen, RRID AB\_141607;  
 anti Rabbit Donkey polyclonal 488, Cat# A-21206, Invitrogen, RRID AB\_2535792;  
 anti Sheep Donkey polyclonal 488, Cat# A-11015, Invitrogen, RRID:AB\_141362;  
 anti Mouse Donkey polyclonal 594, Cat# A-21203, Invitrogen, RRID:AB\_141633;  
 anti Rabbit Donkey polyclonal 594, Cat# A-21207, Invitrogen, RRID:AB\_141637;  
 anti Sheep Donkey polyclonal 594, Cat# A-11016, Invitrogen, RRID:AB\_2534083;  
 anti Mouse Goat polyclonal 633, Cat# A-21052, Invitrogen, RRID:AB\_2535719;  
 anti Rabbit Goat polyclonal 633, Cat# A-21070, Invitrogen, RRID:AB\_2535731;  
 anti Sheep Donkey polyclonal 633, Cat# A-21100, Invitrogen, RRID:AB\_2535754;  
 anti Mouse Donkey polyclonal 647, Cat# A-31571, Invitrogen, RRID:AB\_162542;

anti Rabbit Donkey polyclonal 647, Cat# A-31573, Invitrogen, RRID:AB\_2536183;

Non-commercial antibodies:

anti VLGR1, Rabbit polyclonal, C terminal extremity, aa 6149–6298, accession no. Q8VHN7; V2CD antibody, A. El-Amraoui and C. Petit, Institut Pasteur, Paris, France.

anti human Cone arrestin Rabbit polyclonal, LUMIf-hCAR/human cone arrestin (ARR4), C. M. Craft, University of Southern California Roski Eye Institute, Los Angeles, CA;

#### Validation

Non commercial antibodies :

\* VLGR1, Rabbit polyclonal, C terminal extremity, aa 6149–6298, accession no. Q8VHN7; V2CD antibody, A. El-Amraoui and C. Petit, Institut Pasteur, Paris, France.

- Validated on Xenopus and mouse retina in :

Sahly, I., Dufour, E., Schietroma, C., Michel, V., Bahloul, A., Perfettini, I., Pepermans, E., Estivalet, A., Carette, D., Aghaie, A., Ebermann, I., Lelli, A., Iribarne, M., Hardelin, J. P., Weil, D., Sahel, J. A., El-Amraoui, A., & Petit, C. (2012). Localization of Usher 1 proteins to the photoreceptor calyceal processes, which are absent from mice. *The Journal of cell biology*, 199(2), 381–399. <https://doi.org/10.1083/jcb.201202012>.

- First validation on non-human primate in this paper.

\* human Cone arrestin Rabbit polyclonal, LUMIf-hCAR/human cone arrestin (ARR4).

- Validated on non-human primate retina in :

Craft C., Huang J., Possin D., Hendrickson A. (2014) Primate Short-Wavelength Cones Share Molecular Markers with Rods. In: Ash J., Grimm C., Hollyfield J., Anderson R., LaVail M., Bowes Rickman C. (eds) *Retinal Degenerative Diseases*. *Advances in Experimental Medicine and Biology*, vol 801. Springer, New York, NY. [https://doi.org/10.1007/978-1-4614-3209-8\\_7](https://doi.org/10.1007/978-1-4614-3209-8_7)

## Animals and other organisms

Policy information about [studies involving animals](#); [ARRIVE guidelines](#) recommended for reporting animal research

Laboratory animals

ocular tissues from adult male macaca fascicularis were used in this study.

Wild animals

The study did not involve wild animal.

Field-collected samples

the study did not involved samples collected from the field.

Ethics oversight

local ethics committee, CETEA no.44 of MIRCen

Note that full information on the approval of the study protocol must also be provided in the manuscript.
